# Supplementary material
Source: publisher figshare collection journal article supplement (https://tandf.figshare.com/articles/dataset/_/7770872)
Supplement: Supplementary file 1 [file 1]

HISTORICAL LAND USE AND LAND COVER OF THE NORTHERN COLORADO FRONT RANGE URBAN LANDSCAPE, 1937 TO 1997

1937

1957

1977

1997

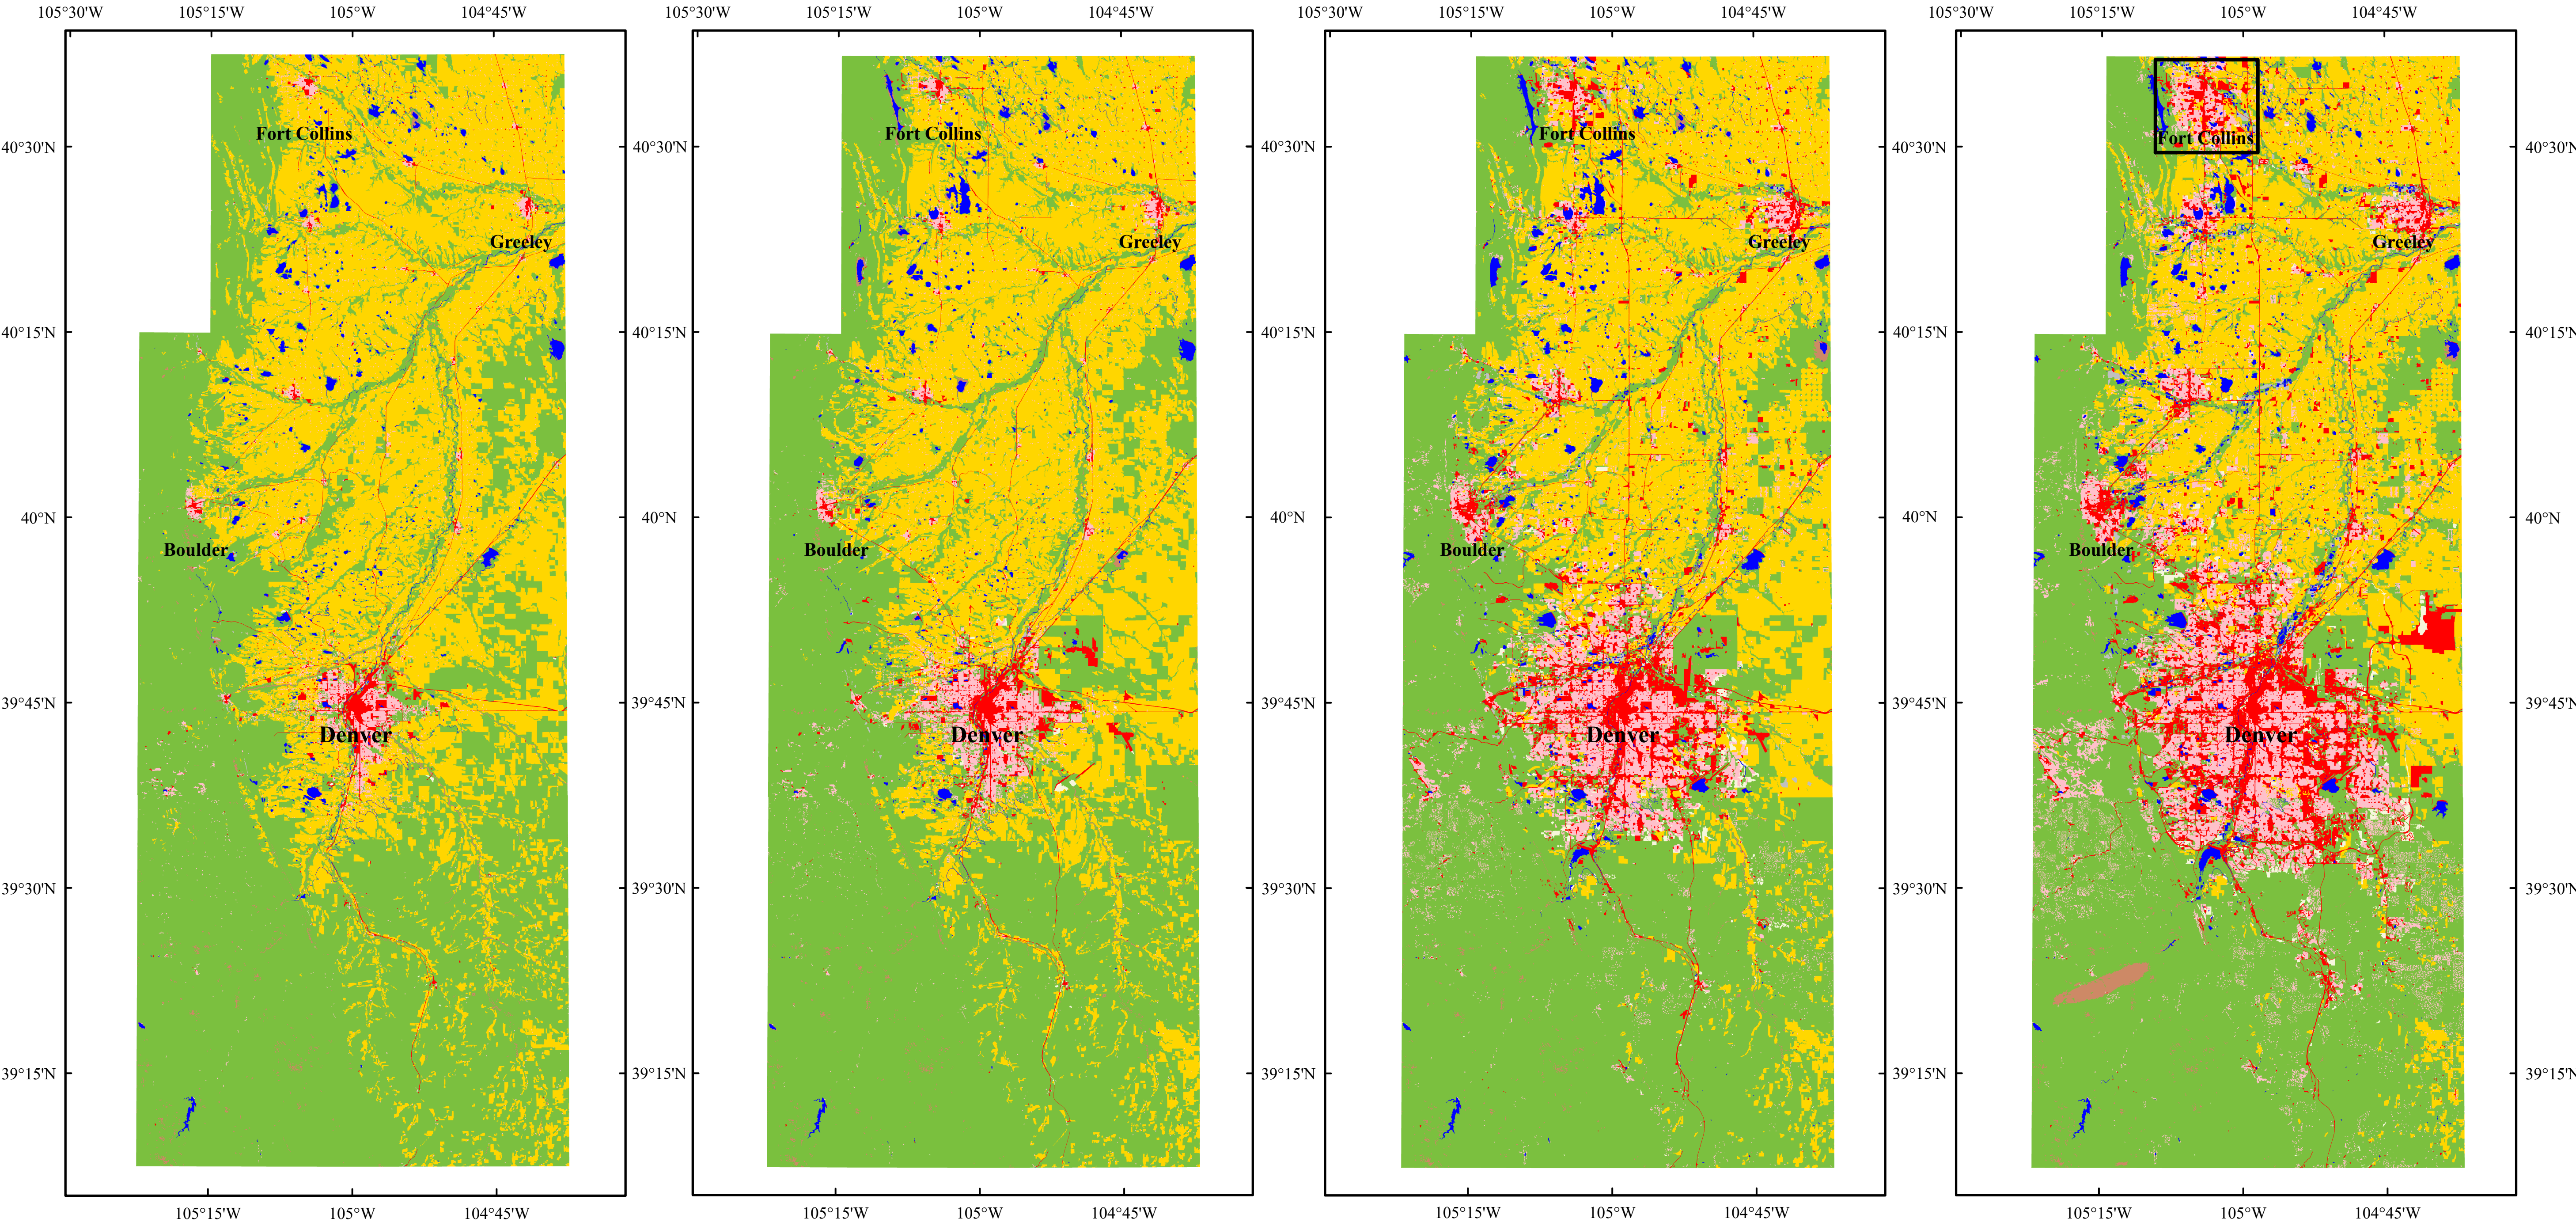

Land-use and land-cover classes

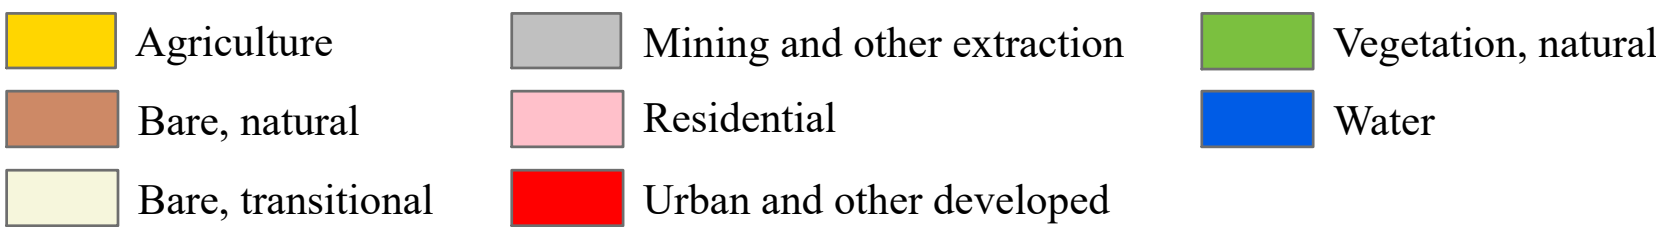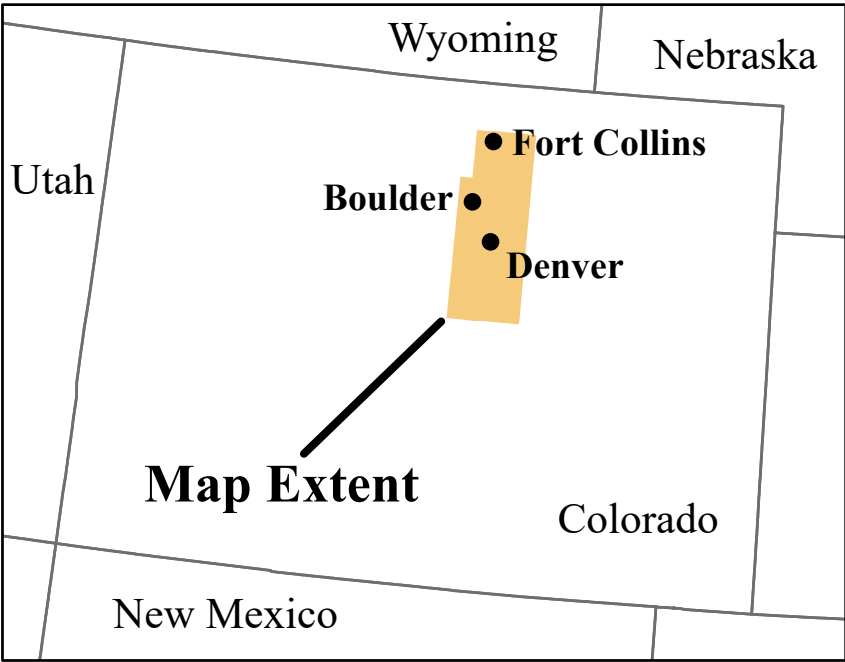

AUTHORS: MARK A. DRUMMOND  
MICHAEL P. STIER  
JAY DIFFENDORFER

U.S. Geological Survey, Denver, Colorado

EXPLANATION: Eight land-use and land-cover (LULC) classes were mapped across the entire study area (1,023,060 hectares) for 1937, 1957, 1977, and 1997. A subset of this area was mapped using a more-detailed LULC classification and is shown in the supplemental material.

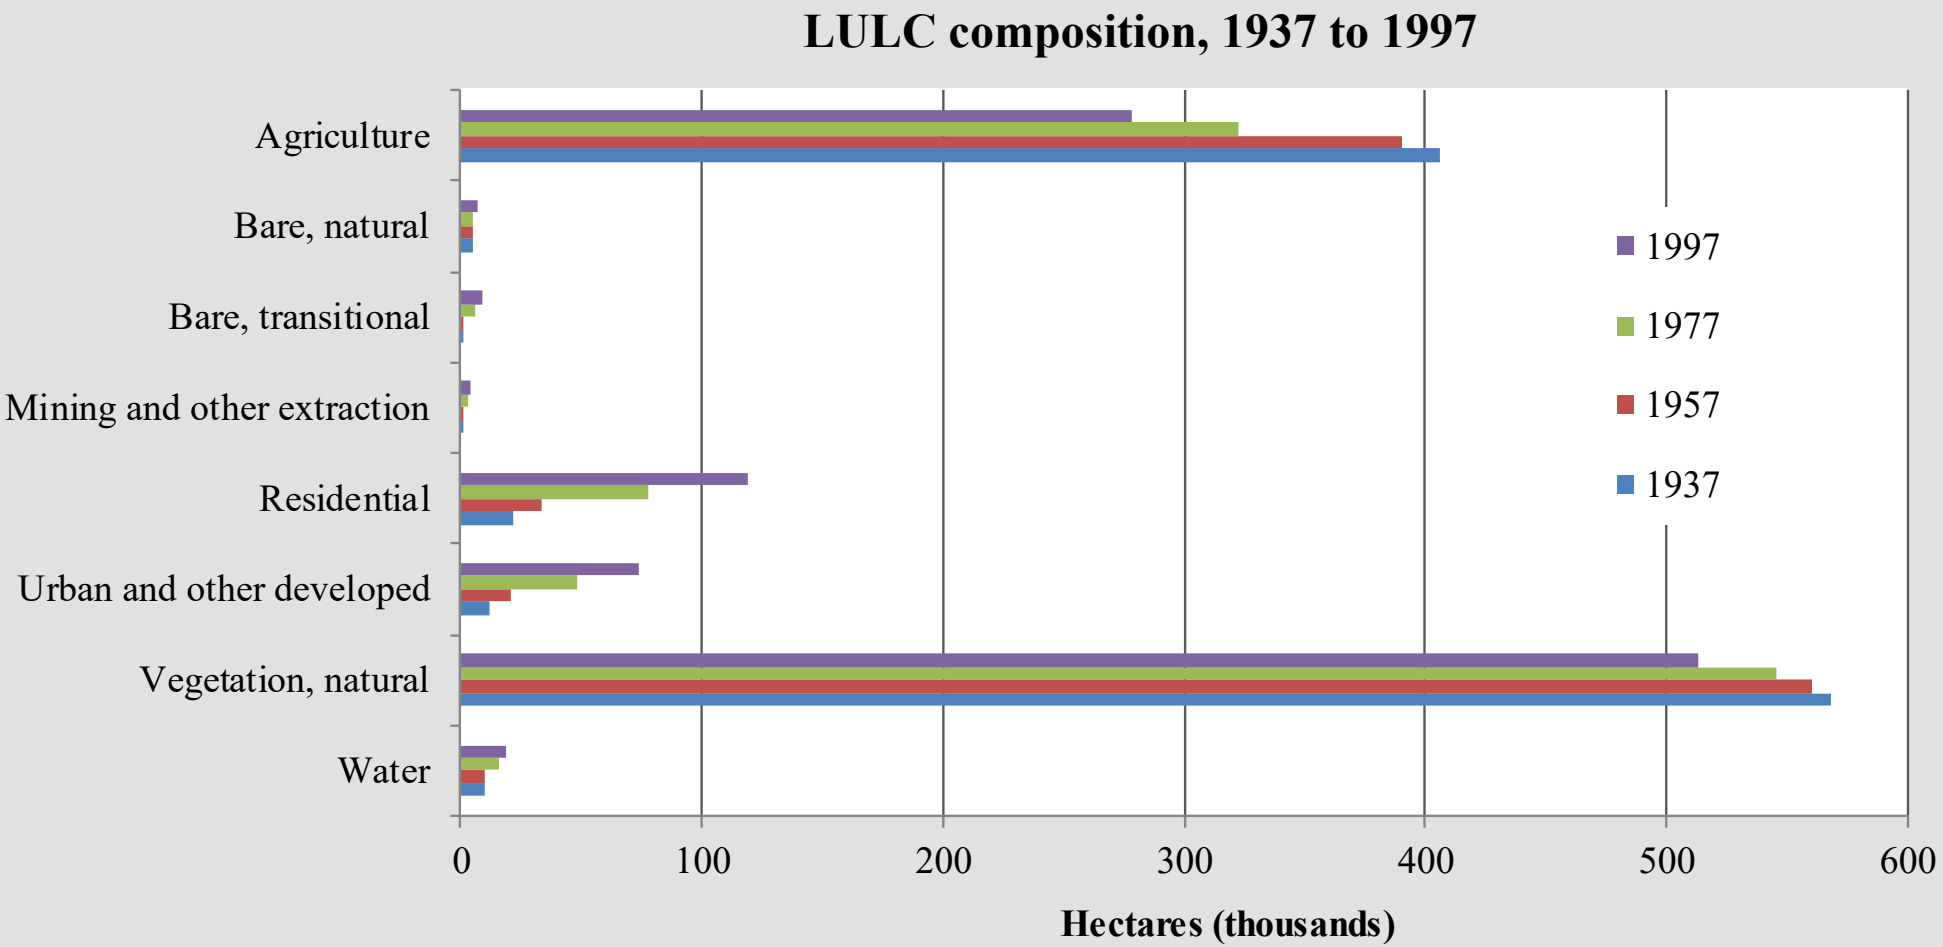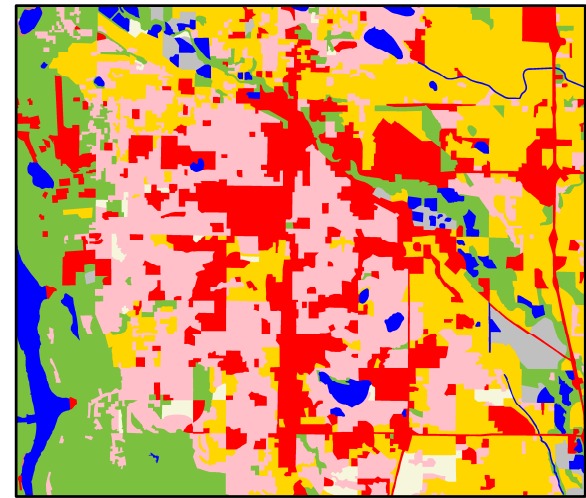

Fort Collins, Colorado (1997)

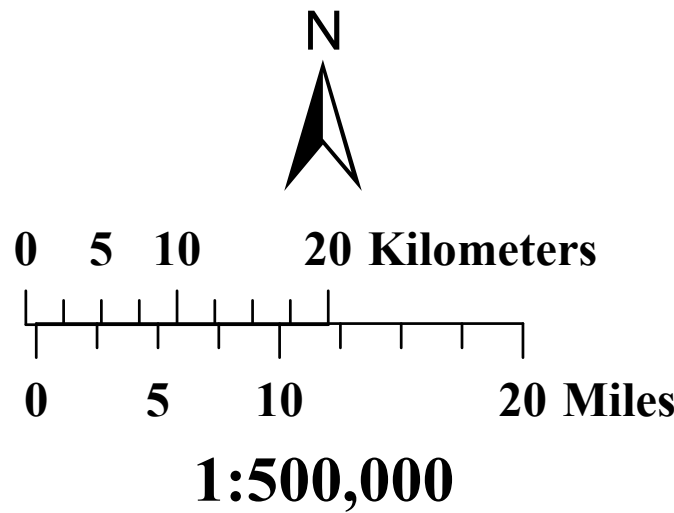

UTM ZONE 13, NORTH (DATUM NORTH AMERICAN 1983)  
© Journal of Maps, 2018
