# Supplementary material
Source: publisher figshare collection journal article supplement (https://tandf.figshare.com/articles/dataset/_/7770872)
Supplement: Supplementary file 2 [file 1]

HISTORICAL LAND USE AND LAND COVER OF THE NORTHERN COLORADO FRONT RANGE URBAN LANDSCAPE, 1937 TO 1997

1937

1957

1977

1997

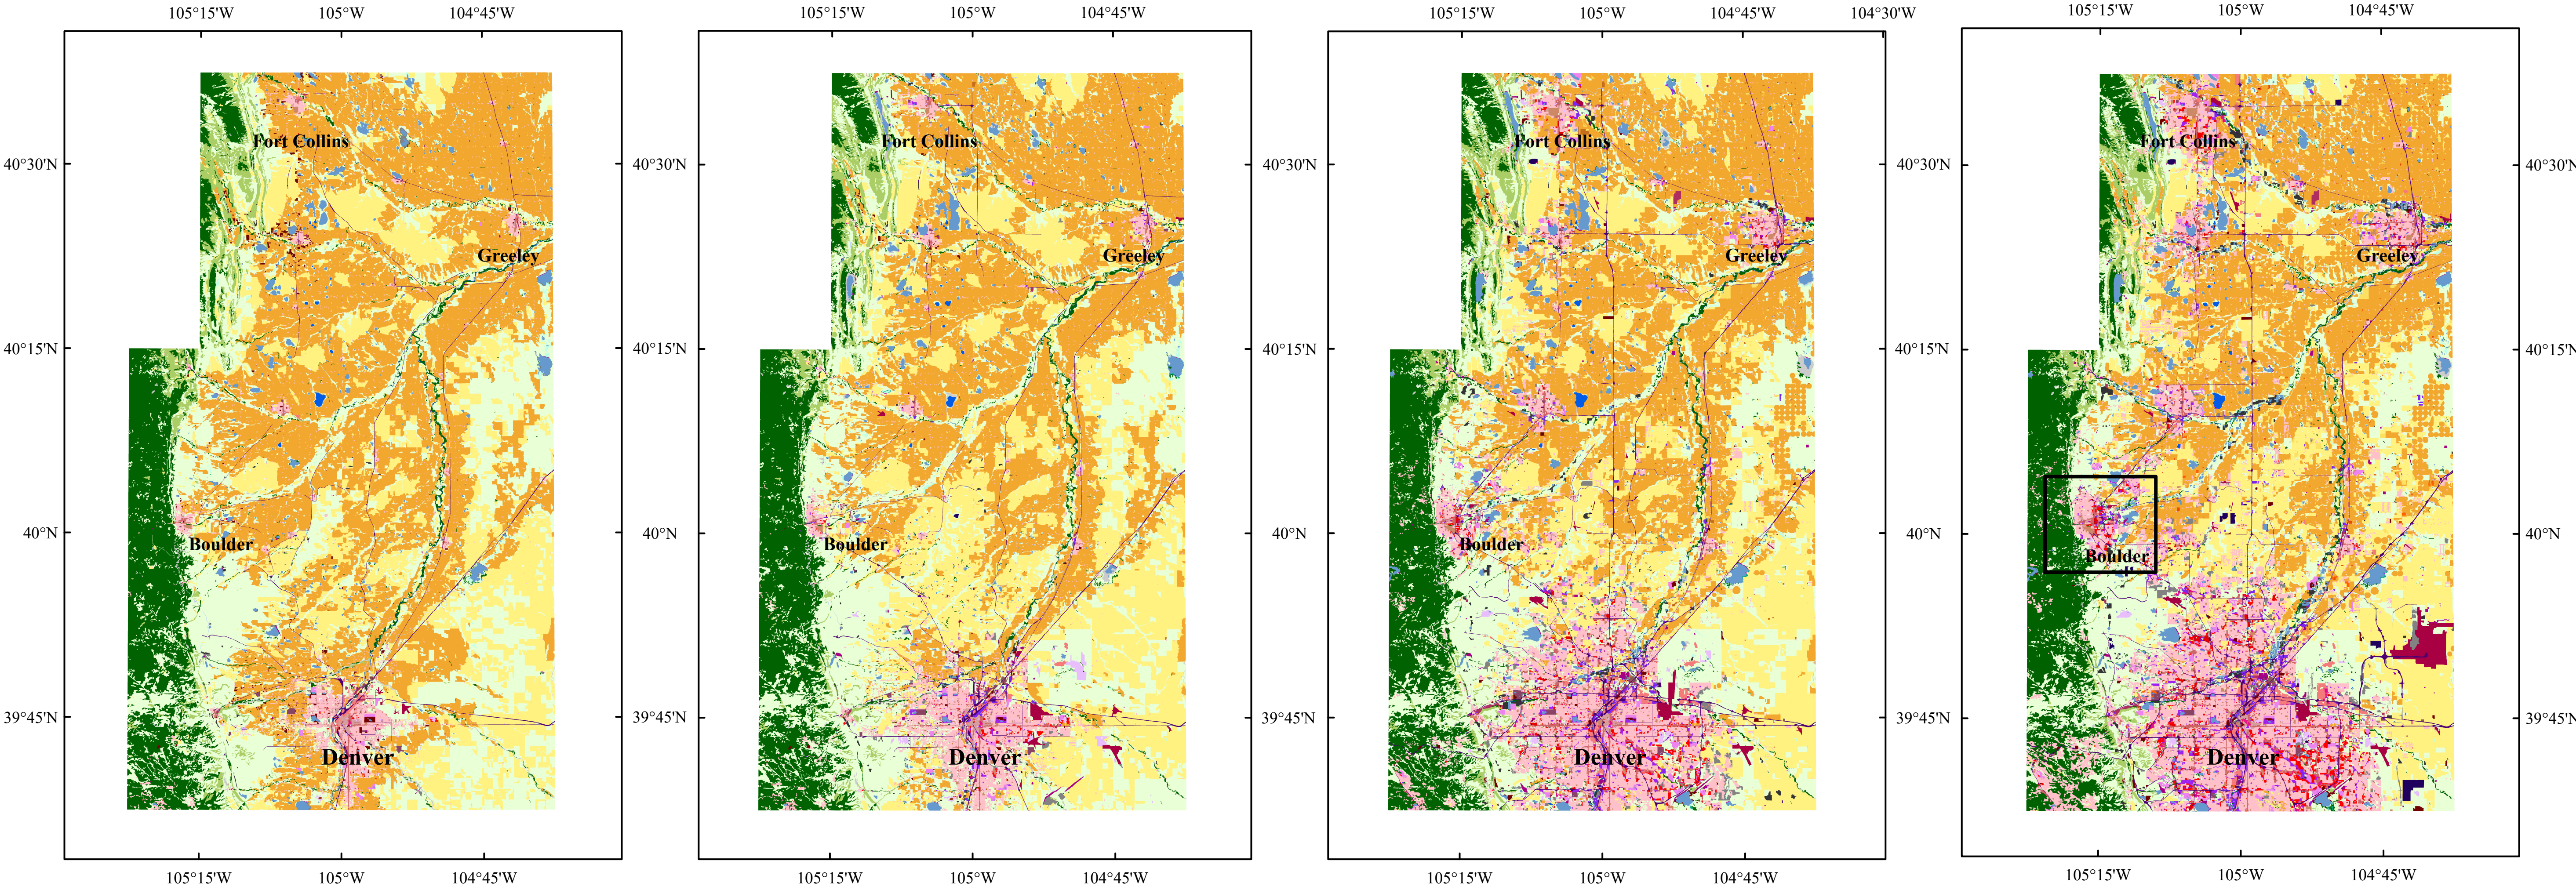

Land-use and land-cover classes

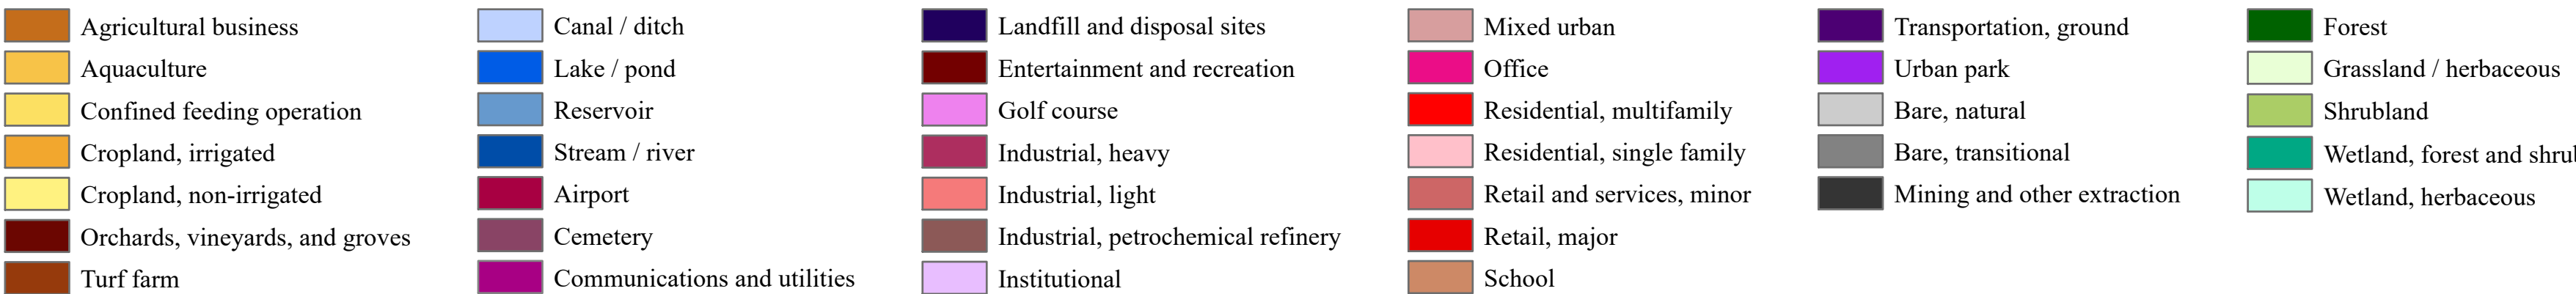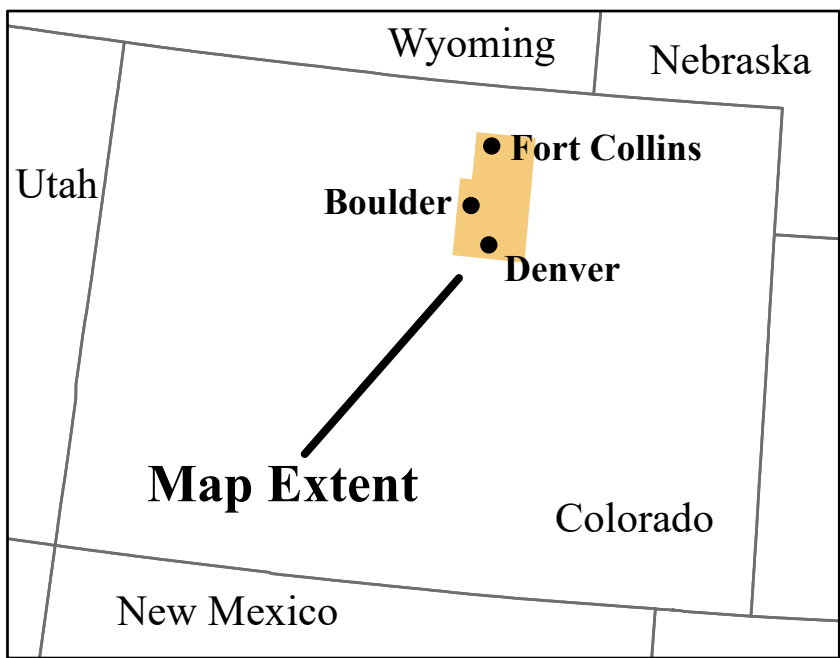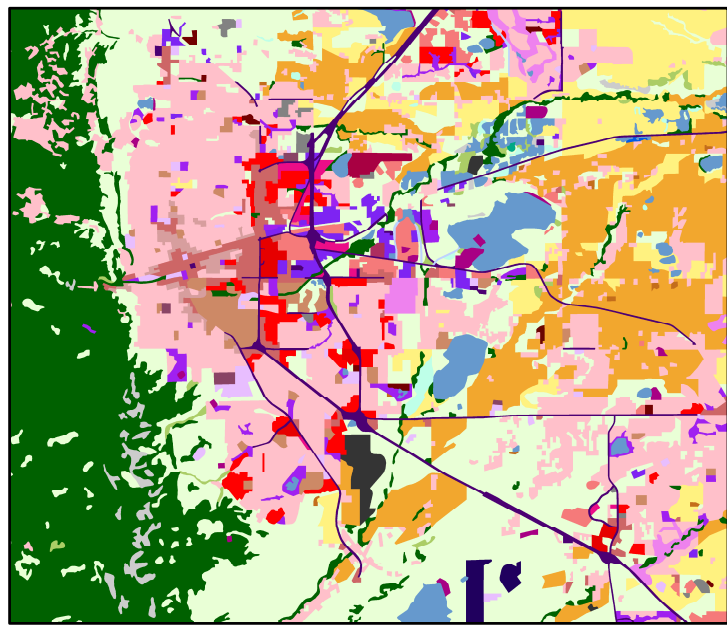

Boulder, Colorado (1997)

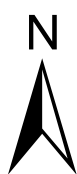

0 5 10 20 Kilometers

0 5 10 20 Miles

1:500,000

UTM ZONE 13, NORTH (DATUM NORTH AMERICAN 1983)  
© Journal of Maps, 2018

EXPLANATION: Thirty-eight detailed Land Use and Land Cover (LULC) classes were identified using manual interpretation techniques, aerial photographs, digital orthophotoquads, historical maps, and other available information. This area covers approximately 660,260 hectares of the Colorado Front Range (including the cities of Boulder, Fort Collins, and the City and County of Denver) for 1937,1957, 1977, and 1997.

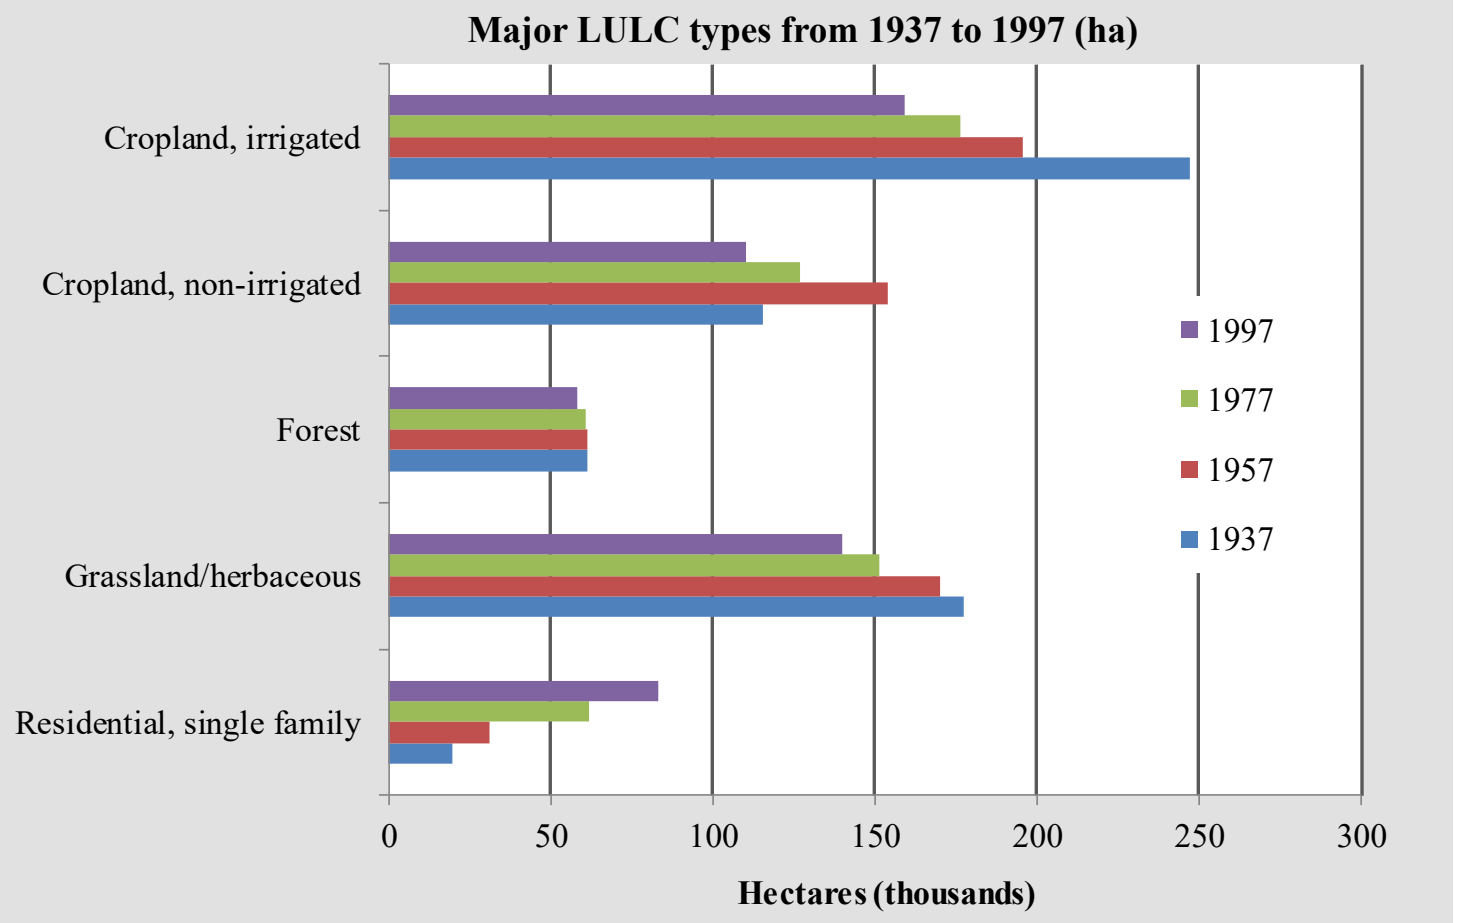

AUTHORS: MARK A. DRUMMOND  
MICHAEL P. STIER  
JAY DIFFENDORFER

U.S. Geological Survey, Denver, Colorado
