# Supplementary material
Source: publisher figshare collection journal article supplement (https://tandf.figshare.com/articles/dataset/_/7770872)
Supplement: Supplementary file 3 [file 1]

Archive with 4 entries (4 files):
- tjom_a_1548383_sm8941.docx
- tjom_a_1548383_sm8940.pdf
- tjom_a_1548383_sm8939.docx
- tjom_a_1548383_sm8938.pdf
