# Supplementary material
Source: publisher figshare collection journal article supplement (https://tandf.figshare.com/articles/dataset/_/7770872)
Supplement: Supplementary file 3 [file 1 › tjom_a_1548383_sm8939.docx]

Supplemental 1. LULC Definitions for the northern Colorado Front Range urban landscape shown in Figure 1 and Supplement 2.

Agriculture – Areas used to grow crops and animals including cultivated grasses, animal feed lots, orchards and cultivated grasses. The majority of these areas are planted and/or maintained for the production of food, feed, fiber, or seed for human and animal consumption.

Agricultural business – Structures and associated grounds related to raising plants or animals including farmsteads and greenhouses. Aquaculture and confined feeding operations are excluded.

Aquaculture - Pools of water and related structures used for producing fish or aquatic plants including fish farms and hatcheries.

Confined feeding operation - Structures and associated pens, storage facilities, waste areas, and ponds which are used for raising meat and dairy cattle, hogs, poultry, or other animals. These features have a relatively permanent and high animal population density.

Cropland, irrigated – Areas that are planted, maintained, and systematically watered for the production of food, feed, fiber, or seed.

Cropland, non-irrigated – Areas that are planted and maintained for the production of food, feed, fiber, or seed with no evidence of infrastructure for irrigation.

Orchards, vineyards, and groves - Areas containing plantings of evenly spaced trees, shrubs, bushes, or other cultivated climbing plants usually supported and arranged evenly in rows. This category also includes berry vines, hops, Christmas tree farms, and commercial tree nurseries. Timber plantations and other lumber or pulp wood plantings are excluded.

Turf farms - Cultivated lawn grasses farmed for use on commercial or residential property.

Water - Areas covered by open water.

Canal/ditch – A human-constructed open waterway for transporting water, to irrigate or drain land, connect two or more bodies of water, or serve as a waterway for watercraft. Included with this feature are the right-of-way and associated dikes and levees.

Lake/pond - Non-flowing, naturally-existing, body of water including water impounded by natural occurrence and artificially regulated natural lakes. The delineation of a lake is based on the areal extent of water at the time the imagery was acquired.

Reservoir - Any artificial body of water. It can lie in a natural basin or a human-constructed basin. The delineation of a reservoir is based on the areal extent of water at the time the imagery was acquired.

Stream/river - A natural body of flowing water. Includes streams and rivers channeled to control flooding, erosion, or to maintain flow for navigation.

Urban and other developed – Built-up areas and their associated grounds.

Residential - Land containing structures used for human habitation including single family and multifamily residences.

Residential, single family - Land used for housing people in single-family dwelling units. Includes trailer parks, mobile home parks, and entire farmsteads when there is a home in the complex.

Residential, multifamily – Land devoted to housing more than one family on a permanent or semi-permanent basis, group living situations, and their associated grounds. Includes apartments, apartment complexes, duplexes, triplexes, attached row houses, condominiums, retirement homes, nursing homes, and residential hotels.

Retail, major – Large structures and associated grounds used for the sale of products and services. This category includes shopping malls, retail “outlet centers”, and “superstores” which draw clientele from a regional area. Major retail centers consist of extremely large single buildings or a complex of large buildings and their parking lots. Includes outlet centers, “superstores”, multiplex movie theaters, shopping malls, and large warehouse-type stores.

Retail and services, minor - Structures and associated grounds used for the sale of products and services. Includes individual stores and services of various sizes and associated grounds and parking. Includes neighborhood strip malls and shopping centers, veterinarian services, small movie theaters, gas stations, auto repair shops, garden centers, motels, small auto dealerships, public parking lots, lumber yards, art galleries, farm supply stores, bars, restaurants, grocery stores, and commercial truck stops.

Office - Structures and associated grounds used for the sale of services and other business activities that provide financial, professional, administrative, and informational type services. Includes administrative government offices (e.g., IRS and State Motor Vehicles offices) trade schools, professional medical office complexes, research facilities/centers, and banks.

Industrial, Light – Structures and their associated grounds and facilities which are used primarily to produce or process a finished product; or as a wholesale distribution center. Activities include design, assembly, finishing, and packaging, warehousing or shipping of products rather than processing raw materials. Generally, these industries are do not produce a lot of waste materials. Examples include: electronic firms, clothing and furniture manufacturers, grain elevators, printing plants, commercial bakeries, shipping and distribution centers, sand/gravel sorting facilities, secondary buildings associated with a mining or quarrying site, and warehouses.

Industrial, heavy - Structures and their associated grounds used for fabrication, manufacturing and assembling of large and heavy parts; or for processing raw materials such as iron ore, timber, and animal products. Heavy industries generally require large amounts of energy and raw materials and produce a significant amount of waste products. Indicators of heavy industry may be stockpiles of raw materials, energy producing sources and fuels, waste disposal areas and ponds, transportation facilities capable of handling heavy materials, smokestacks, furnaces, tanks, and extremely large. Industry examples include: steel mills, paper mills, lumber mills, cotton gins, chemical plants, cement and brick plants, smelters, rock crushing machinery, and ore-processing facilities associated with mining.

Industrial, petrochemical refinery – Structures, waste ponds, and all associated equipment and grounds used for processing petro-chemicals.

Communications and Utilities - Structures or facilities and associated grounds used for the generation of power and communications, the treatment or storage of drinking water, waste management, flood control, or the distribution and storage of gas and oil not associated with a unique feature. Includes pumping stations (oil, gas, or water), tank farms, power plants, electric substations, sewage treatment facilities and ponds, garbage collection facilities, dams, levees, and spillways, filtration plants, and heavy concentrations of antennas or satellite dishes; along with the related operational buildings.

Institutional – Specialized government, public, or private features which meet the religious, medical, governmental, protective, and correctional needs of the public. Parking lots and associated grounds are included with these features. Includes state capitols, city halls, courthouses, libraries, churches, convents, monasteries, hospitals and training hospitals, post offices, police and fire departments, prisons, and military bases.

School – Public and private schools, universities, and seminaries including athletic fields and other associated land.

Cemetery - Structures and lands devoted to burial of the deceased. Includes mausoleums, service areas, and parking lots.

Transportation, ground – Structures and land associated with the movement of people, animals, and goods from one location to another. Roads and railroads include the right-of-way, interchanges, and median strips. Category includes railroad stations, railroad yards, bus stations, highway maintenance yards, school bus parking and service yards, and park-and-ride lots. Port facilities include loading and unloading facilities, docks, locks and, temporary storage areas.

Airport - Includes the maintained active and overrun areas of the runways, landing strips, and taxiways, with the intervening land; along with the plane tie-down areas, terminals, hangers, related fuel storage facilities, service buildings, parking lots, navigation aids, and airport offices.

Urban Park - Designated open space in urban settings used for outdoor recreation. Include grass fields and associated structures, parking lots, and facilities. Includes city parks, “green-belt” urban parks, and athletic fields not associated with a school.

Golf Course - Structures, associated grounds, driving ranges, and interspersed natural areas used for the game of golf.

Entertainment and recreation - Areas and structures used predominantly for athletic or artistic events, or for leisure activities, and all associated lands and developed parking areas. Includes outdoor amphitheaters, drive-in theaters, campgrounds, zoos, sports arenas, community recreation centers, museums, amusement parks, public swimming pools, and fairgrounds.

Landfill and disposal sites – Sites for disposal, storage, or burial of waste materials including trash dumps or hazardous-waste disposal sites. Reclaimed disposal areas covered with vegetation are not included.

Mixed Urban - Developed areas which have a mixture of residential and non-residential features where no single feature meets the minimum mapping unit (2.5 acres) specification. This category is used when more than one-third of the features in an area do not fit into a single category.

Mining and other extraction – Areas of extractive mining activities with significant surface disturbance. Vegetative cover and overburden are removed for the extraction of deposits such as coal, iron ore, limestone, copper, sand and gravel, or building and decorative stone. Includes strip mines, open-pit mines, quarries, borrow pits, oil and gas drilling sites, and gravel pits with their associated structures, waste dumps, and stockpiles.

Bare Rock/Sand - Undeveloped areas of the earth that exhibit less than 25% vegetative cover including bare bedrock, natural sand beaches, sand bars, mud flats, deserts, desert pavement, scarps, talus, slides, lava, and glacial debris.

Bare, transitional - Areas dynamically changing from one land cover/land use to another, often because of land use activities. Includes all construction areas, areas transitioning between forest and agricultural land, or urban renewal areas in a state of transition.

Bare, fire burn scar – Vegetated areas destroyed by wildfire that exhibit less than 25% vegetative cover.

Vegetation, natural – Areas with 25% or more vegetation including natural and semi-natural forest, shrubland, grassland, and wetland vegetation.

Forest - Areas with at least 25% tree canopy.

Shrubland - Areas with at least 25% canopy cover in which existing vegetation is dominated by plants that have persistent woody stems, a relatively low growth habit, and which generally produce several basal shoots instead of a single shoot. Includes true shrubs, trees that are small or stunted because of environmental conditions, desert scrub, and chaparral. Clear-cut areas will exhibit a stage of shrub cover during the regrowth cycle. Some common species include mountain mahogany, sagebrush, and scrub oak.

Grassland / Herbaceous - Areas dominated by non-woody plants such as grasses, forbs, ferns and weeds, either native, naturalized, or planted. Trees must account for less than 25% canopy cover while herbaceous plants dominate all existing vegetation. Includes vegetated vacant lots and areas where it cannot be determined whether the vegetation was planted or cultivated such as in areas of dispersed grazing by feral or domesticated animals. Includes landscapes dominated by grass-like plants such as bunch grasses, Palouse grass, as well as true prairie grasses.

Wetland, forest and shrub - Areas where the water table is at, near, or above the land surface for a significant part of most years and the vegetation covers more than 25% of the land surface. Includes areas dominated by woody vegetation that are represented by seasonally flooded bottomland, including bogs. Central and northern flood plains are often dominated by cottonwoods, ash, alder, and willow.

Wetland, herbaceous - Areas where the water table is at, near, or above the land surface for a significant part of most years and the vegetation covers more than 25% of the land surface. Includes areas covered by wetland herbaceous vegetation which is present for most of the growing season. Includes fresh-water, brackish-water, and salt-water marshes, mountain meadows, wet prairies, and open bogs.
