# Supplementary material
Source: publisher figshare collection journal article supplement (https://tandf.figshare.com/articles/dataset/_/7770872)
Supplement: Supplementary file 3 [file 1 › tjom_a_1548383_sm8941.docx]

Supplemental 3: Table showing the relationship of LULC categories between the two map groups.

| **Figure 1 classification** | **Supplemental 2 classification** |
| --- | --- |
| Agriculture | Agricultural business |
|  | Aquaculture |
|  | Confined feeding operations |
|  | Cropland, irrigated |
|  | Cropland, non-irrigated |
|  | Orchards, vineyards, and groves |
|  | Turf farm |
| Bare, natural | Bare rock / sand |
| Bare, transitional | Bare, transitional |
| Mining and other extraction | Quarries / Strip mines / Gravel pits |
| Residential | Residential, multifamily |
|  | Residential, single family |
| Urban and other developed | Airport |
|  | Cemetery |
|  | Communications and utilities |
|  | Landfill and disposal sites |
|  | Entertainment and recreation |
|  | Golf course |
|  | Industrial, heavy |
|  | Industrial, light |
|  | Industrial, pertrochemical refinery |
|  | Institutional |
|  | Mixed urban |
|  | Office |
|  | Retail and services, minor |
|  | Retail, major |
|  | School |
|  | Transportation, ground |
|  | Urban park |
| Vegetation, natural | Forest |
|  | Grassland / herbaceous |
|  | Shrubland |
|  | Wetland, forest and shrub |
|  | Wetland, herbaceous |
| Water | Canal / ditch |
|  | Lake /pond |
|  | Reservoir |
|  | Stream / river |
